# Supplementary material for: Spongenolactones A–C, Bioactive 5,5,6,6,5-Pentacyclic Spongian Diterpenes from the Red Sea Sponge Spongia sp.
Source: MDPI journal article supplement (doi:10.3390/md20080498), 2022-08-01
Supplement: s1 [file s1]

# Spongenolactones A–C, Bioactive 5,5,6,6,5-Pentacyclic Spongian Diterpenes from the Red Sea Sponge *Spongia* sp.

Chi-Jen Tai <sup>1</sup>, Atallah F. Ahmed <sup>2,3</sup>, Chih-Hua Chao <sup>4,5</sup>, Chia-Hung Yen <sup>6,7</sup>, Tsong-Long Hwang <sup>8,9,10</sup>, Fang-Rong Chang <sup>6</sup>, Yusheng M. Huang <sup>11,12</sup> and Jyh-Horng Sheu <sup>1,6,13,14,\*</sup>

<sup>1</sup> Doctoral Degree Program in Marine Biotechnology, National Sun Yat-sen University, Kaohsiung 80424, Taiwan; d035620001@nssu.edu.tw

<sup>2</sup> Department of Pharmacognosy, College of Pharmacy, King Saud University, Riyadh 11451, Saudi Arabia; afahmed@ksu.edu.sa

<sup>3</sup> Department of Pharmacognosy, Faculty of Pharmacy, Mansoura University, Mansoura 35516, Egypt

<sup>4</sup> School of Pharmacy, China Medical University, Taichung 40604, Taiwan; chchao@mail.cmuh.edu.tw

<sup>5</sup> Chinese Medicine Research and Development Center, China Medical University Hospital, Taichung 40604, Taiwan

<sup>6</sup> Graduate Institute of Natural Products, College of Pharmacy, Kaohsiung Medical University, Kaohsiung 80708, Taiwan; chyen@kmu.edu.tw (C.-H.Y.), aaronfrc@kmu.edu.tw (F.-R.C.)

<sup>7</sup> National Natural Product Libraries and High-Throughput Screening Core Facility, Kaohsiung Medical University, Kaohsiung 80708, Taiwan

<sup>8</sup> Graduate Institute of Natural Products, College of Medicine, Chang Gung University, Taoyuan 333, Taiwan; htl@mail.cgu.edu.tw

<sup>9</sup> Research Center for Chinese Herbal Medicine, Graduate Institute of Healthy Industry Technology, College of Human Ecology, Chang Gung University of Science and Technology, Taoyuan 33303, Taiwan

<sup>10</sup> Department of Anesthesiology, Chang Gung Memorial Hospital, Taoyuan 333423, Taiwan

<sup>11</sup> Department of Marine Recreation, National Penghu University of Science and Technology, Magong, Penghu 88046, Taiwan; yusheng@gms.npu.edu.tw

<sup>12</sup> Tropical Island Sustainable Development Research Center, National Penghu University of Science and Technology, Magong, Penghu 88046, Taiwan.

<sup>13</sup> Department of Marine Biotechnology and Resources, National Sun Yat-sen University, Kaohsiung 80424, Taiwan.

<sup>14</sup> Department of Medical Research, China Medical University Hospital, China Medical University, Taichung 404333, Taiwan.

\* Correspondence: sheu@mail.nssu.edu.tw; Tel.: +886-7-525-2000 (ext. 5030); Fax: +886-7-525-5020.

# Contents

|                                                                                        |    |
|----------------------------------------------------------------------------------------|----|
| <b>Table S1.</b> The cartesian coordinates of conformer <b>1</b> .....                 | 8  |
| <b>Table S2.</b> The cartesian coordinates of conformer <b>2</b> .....                 | 17 |
| <b>Table S3.</b> The cartesian coordinates of conformer <b>3</b> .....                 | 22 |
| <b>Table S4.</b> The cartesian coordinates of conformer <b>3c</b> .....                | 23 |
| <b>Table S5.</b> Cytotoxicity ( ED <sub>50</sub> µg/mL) of compounds <b>1–3</b> . .... | 24 |
| <br>                                                                                   |    |
| <b>Figure S1.</b> HRESIMS spectrum of <b>1</b> . ....                                  | 3  |
| <b>Figure S2.</b> <sup>1</sup> H NMR spectrum of <b>1</b> . ....                       | 3  |
| <b>Figure S3.</b> <sup>13</sup> C NMR spectrum of <b>1</b> . ....                      | 4  |
| <b>Figure S4.</b> DEPT spectrum of <b>1</b> .....                                      | 4  |
| <b>Figure S5.</b> HSQC spectrum of <b>1</b> .....                                      | 5  |
| <b>Figure S6.</b> <sup>1</sup> H– <sup>1</sup> H COSY spectrum of <b>1</b> .....       | 5  |
| <b>Figure S7.</b> HMBC spectrum of <b>1</b> . ....                                     | 6  |
| <b>Figure S8.</b> NOESY spectrum of <b>1</b> .....                                     | 6  |
| <b>Figure S9.</b> The partial NOESY spectrum of <b>1</b> . ....                        | 7  |
| <b>Figure S10.</b> HRESIMS spectrum of <b>2</b> . ....                                 | 12 |
| <b>Figure S11.</b> <sup>1</sup> H NMR spectrum of <b>2</b> . ....                      | 12 |
| <b>Figure S12.</b> <sup>13</sup> C NMR spectrum of <b>2</b> . ....                     | 13 |
| <b>Figure S13.</b> DEPT spectrum of <b>2</b> .....                                     | 13 |
| <b>Figure S14.</b> HSQC spectrum of <b>2</b> . ....                                    | 14 |
| <b>Figure S15.</b> <sup>1</sup> H– <sup>1</sup> H COSY spectrum of <b>2</b> .....      | 14 |
| <b>Figure S16.</b> HMBC spectrum of <b>2</b> .....                                     | 15 |
| <b>Figure S17.</b> NOESY spectrum of <b>2</b> . ....                                   | 15 |
| <b>Figure S18.</b> The partial NOESY spectrum of <b>2</b> . ....                       | 16 |

|                                                                                  |    |
|----------------------------------------------------------------------------------|----|
| <b>Figure S19.</b> HRESIMS spectrum of <b>3</b> . .....                          | 18 |
| <b>Figure S20.</b> $^1\text{H}$ NMR spectrum of <b>3</b> . .....                 | 18 |
| <b>Figure S21.</b> $^{13}\text{C}$ NMR spectrum of <b>3</b> . .....              | 19 |
| <b>Figure S22.</b> HSQC spectrum of <b>3</b> . .....                             | 19 |
| <b>Figure S23.</b> $^1\text{H}$ – $^1\text{H}$ COSY spectrum of <b>3</b> . ..... | 20 |
| <b>Figure S24.</b> HMBC spectrum of <b>3</b> . .....                             | 20 |
| <b>Figure S25.</b> NOESY spectrum of <b>3</b> . .....                            | 21 |
| <b>Figure S26.</b> The partial NOESY spectrum of <b>3</b> . .....                | 21 |

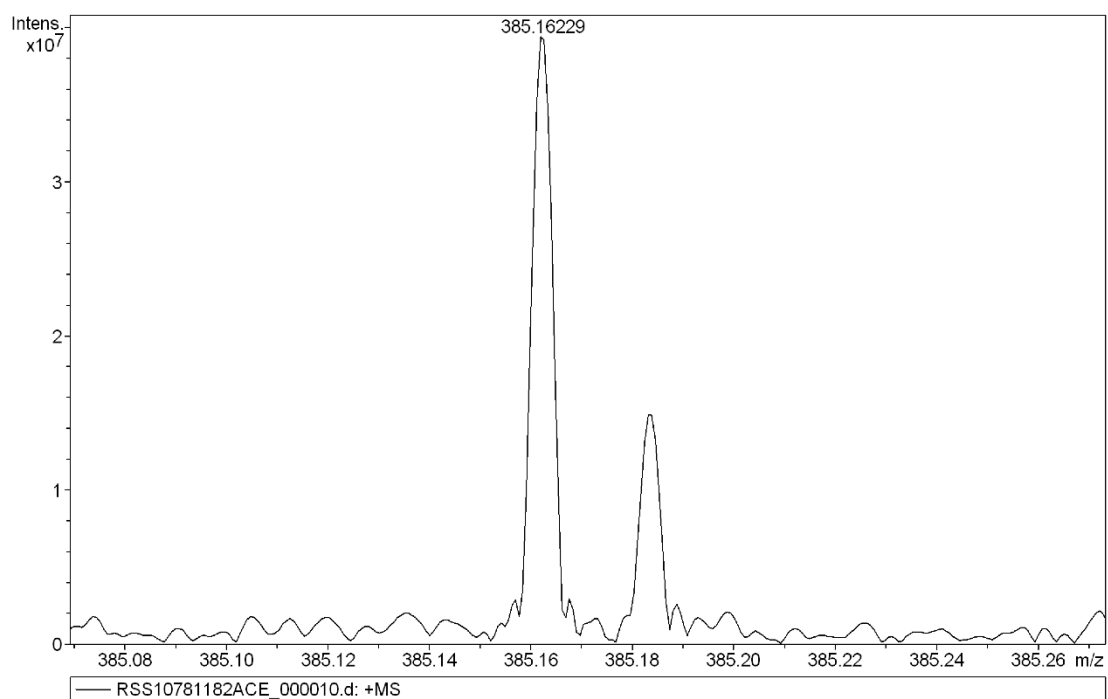

| Meas. m/z | # | Formula                                          | Score  | m/z       | err [mDa] | err [ppm] | mSigma | rdb | e <sup>-</sup> Conf | N-Rule |
|-----------|---|--------------------------------------------------|--------|-----------|-----------|-----------|--------|-----|---------------------|--------|
| 385.16229 | 1 | C <sub>20</sub> H <sub>26</sub> NaO <sub>6</sub> | 100.00 | 385.16216 | -0.13     | -0.33     | 20.9   | 7.5 | even                | ok     |

**Figure S1.** HRESIMS spectrum of **1**.

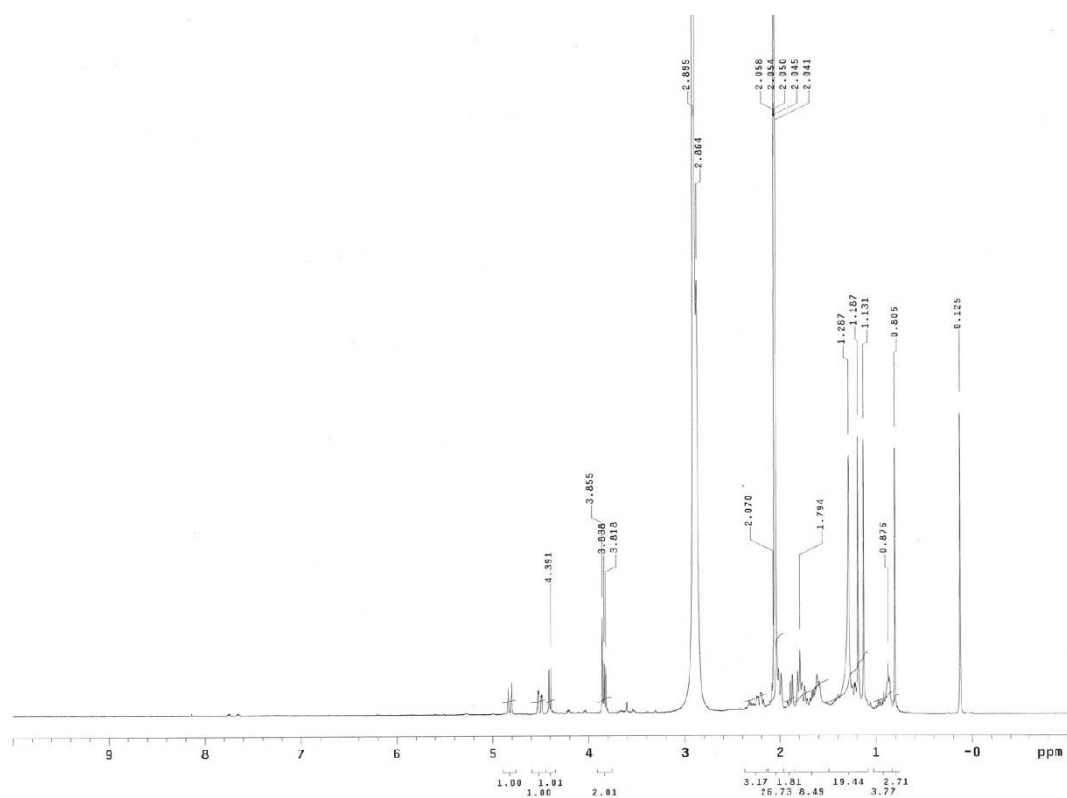

**Figure S2.** <sup>1</sup>H NMR spectrum of **1**.

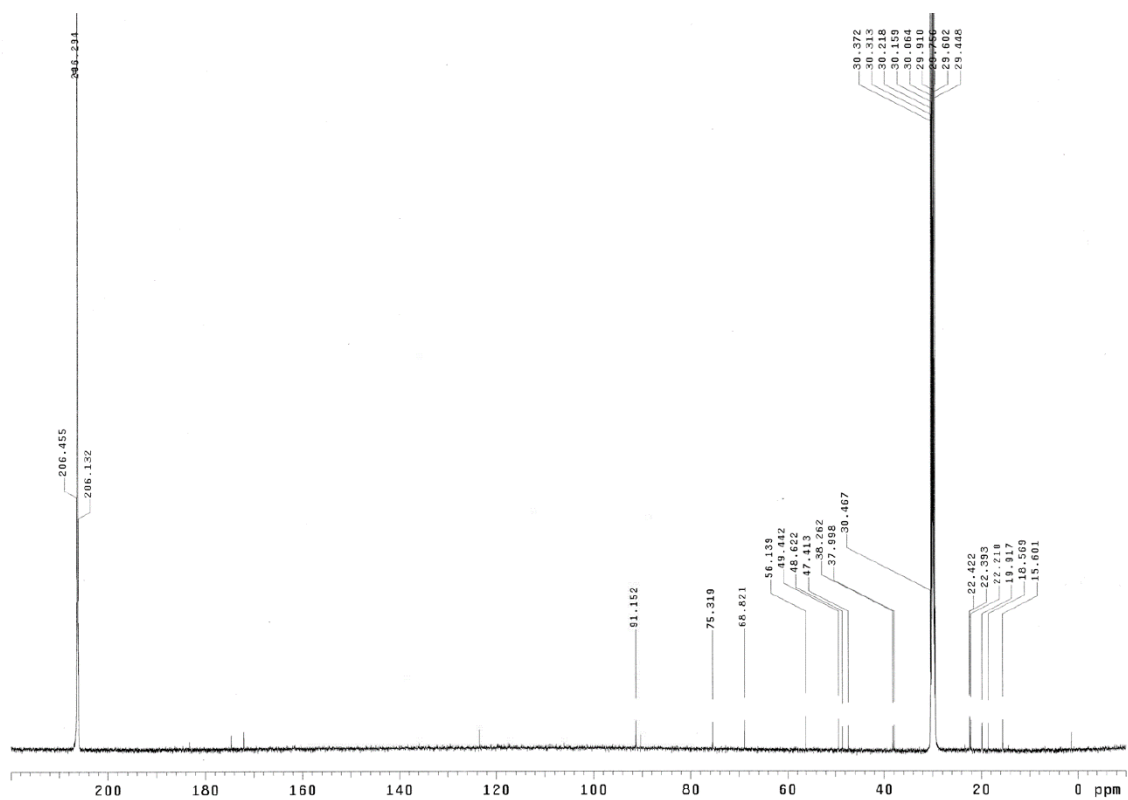

**Figure S3.**  $^{13}\text{C}$  NMR spectrum of **1**.

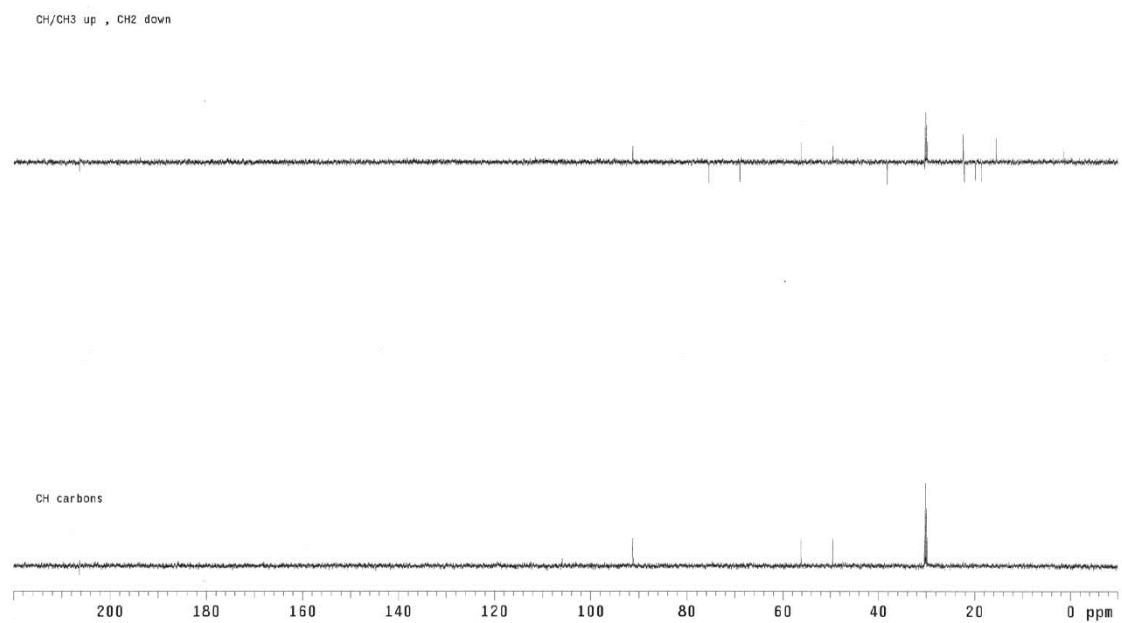

**Figure S4.** DEPT spectrum of **1**.

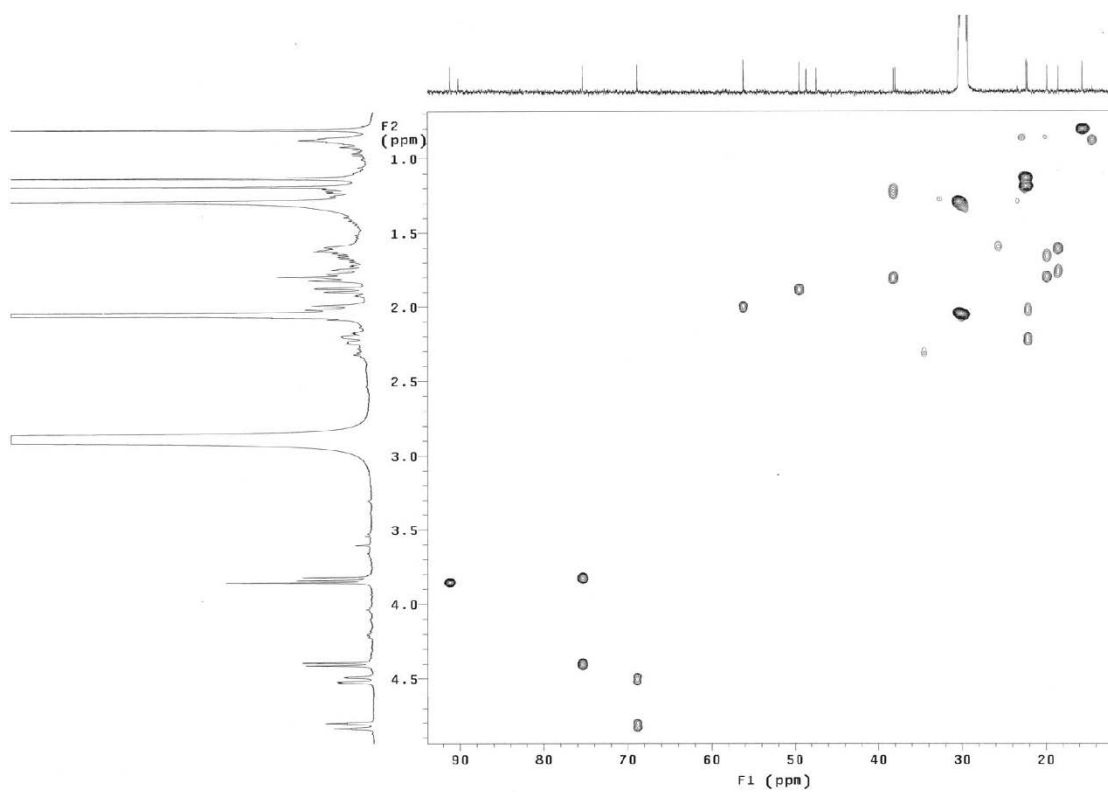

**Figure S5.** HSQC spectrum of **1**

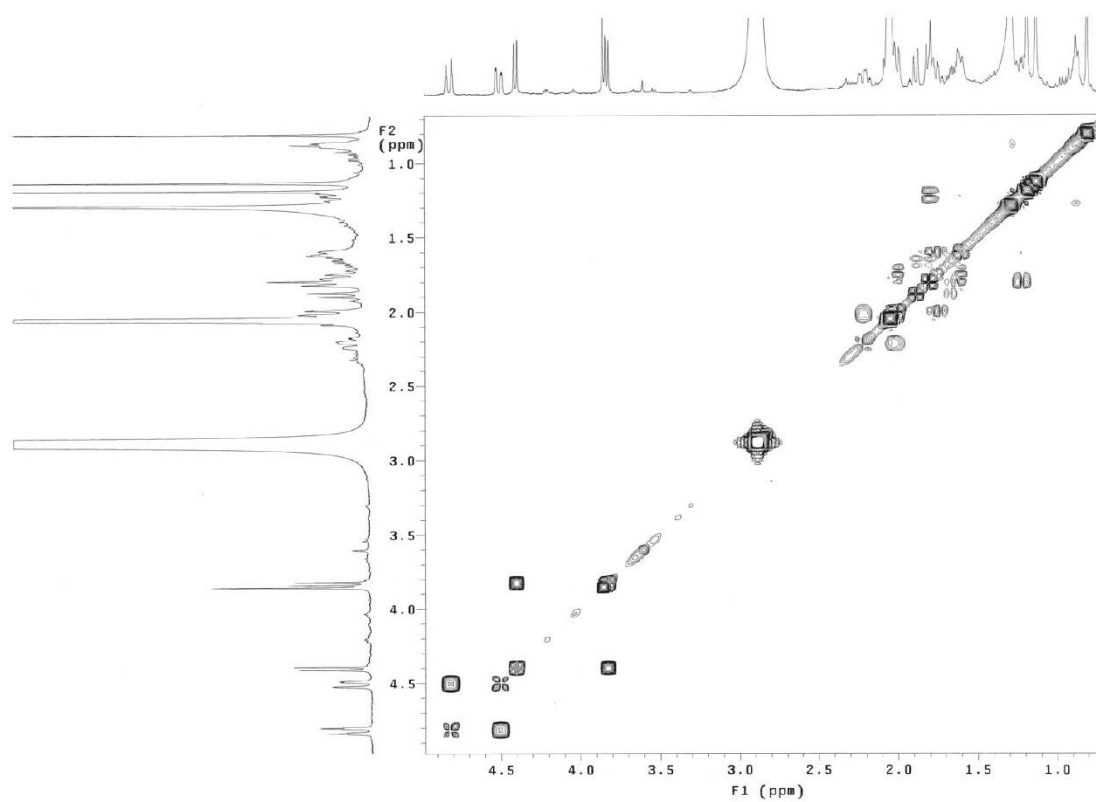

**Figure S6.**  $^1\text{H}$ – $^1\text{H}$  COSY spectrum of **1**.

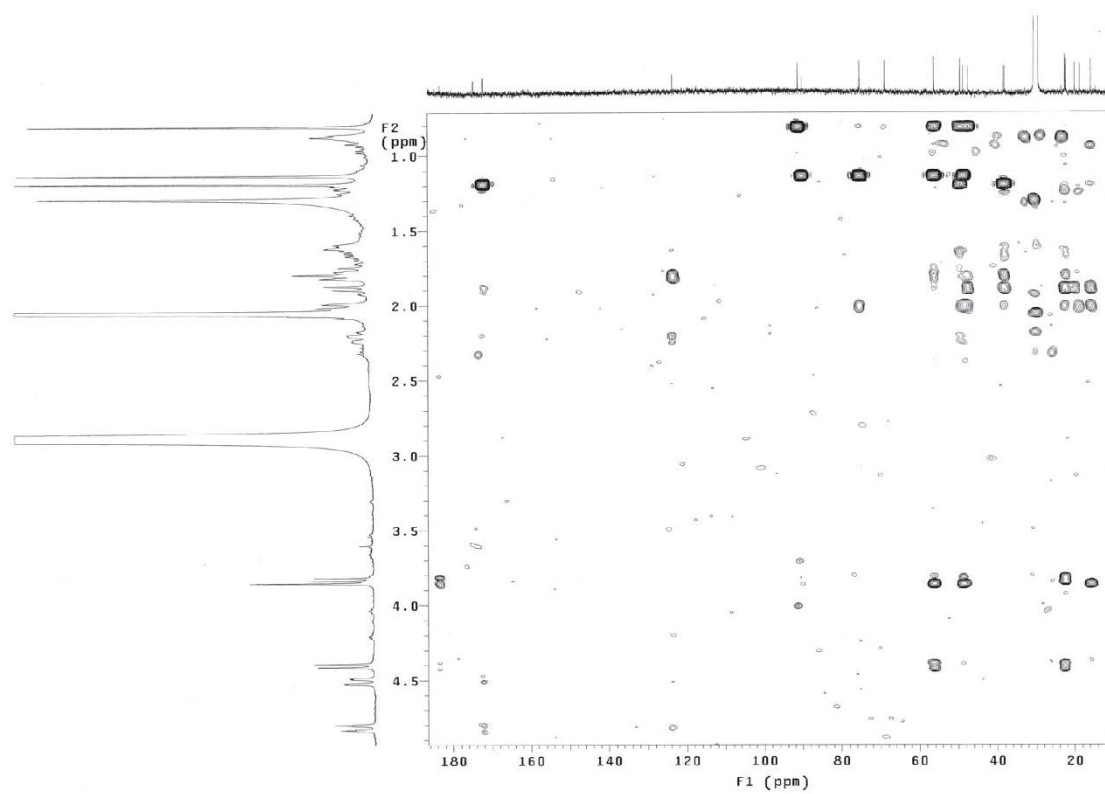

**Figure S7.** HMBC spectrum of **1**.

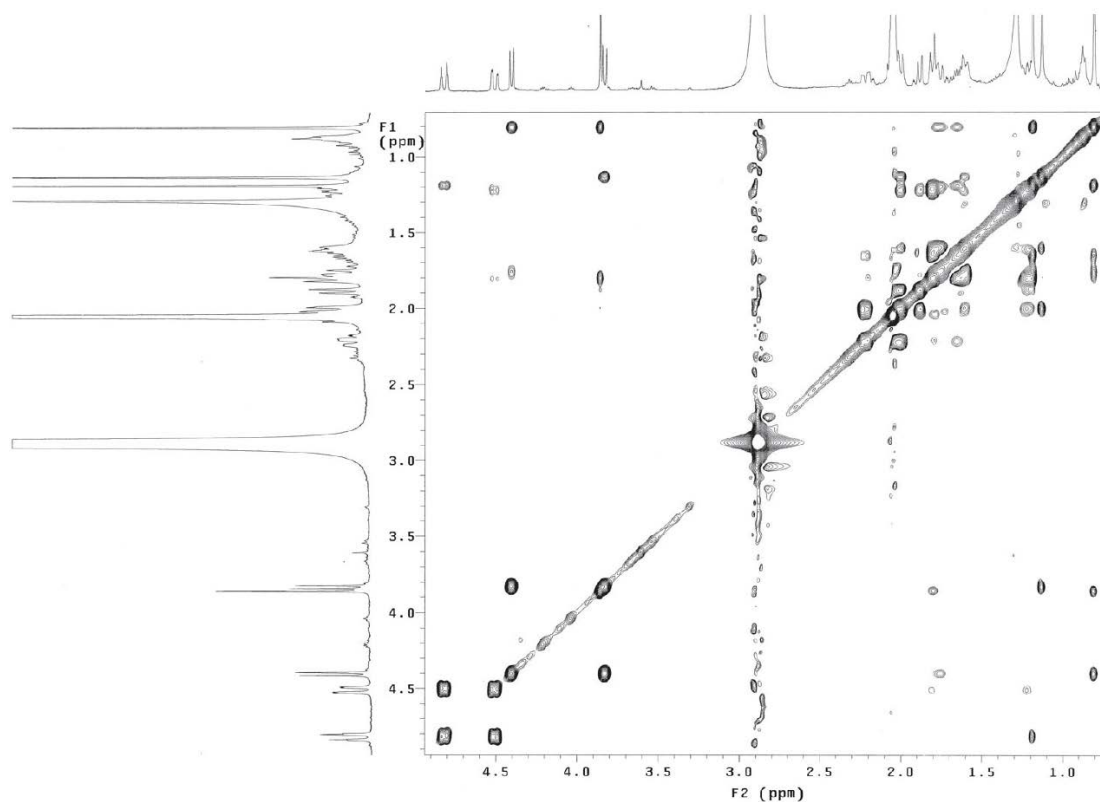

**Figure S8.** NOESY spectrum of **1**.

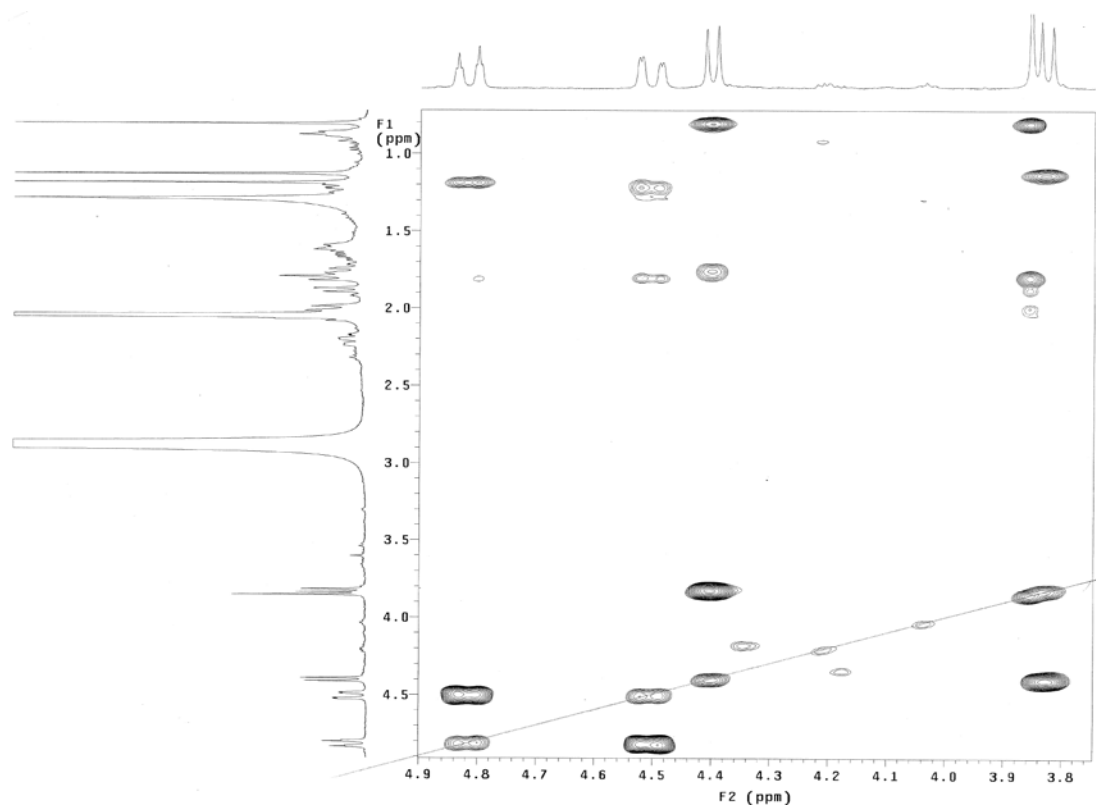

**Figure S9.** The partial NOESY spectrum of **1**.



**Table S1.** The cartesian coordinates of conformer **1**.

|   |             |             |             |   |             |             |             |
|---|-------------|-------------|-------------|---|-------------|-------------|-------------|
| C | 0.70248400  | -0.20906500 | 0.39088000  | H | 0.70787800  | 0.89531800  | -1.41518100 |
| C | 1.08764200  | 1.07733100  | -0.39752400 | H | 0.56607200  | 2.55719300  | 1.12496100  |
| C | 0.34766600  | 2.32798100  | 0.07582700  | H | 0.65995800  | 3.20459500  | -0.50263700 |
| C | -1.16613600 | 2.10892300  | -0.13621200 | H | -1.34947600 | 2.04286600  | -1.21644500 |
| C | -1.70961500 | 0.82182500  | 0.54934800  | H | -1.72536000 | 2.97987400  | 0.22537700  |
| C | -0.82074900 | -0.42075200 | 0.14823000  | H | -0.91410100 | -0.46910500 | -0.94747700 |
| C | -3.10126100 | 0.48946300  | 0.05290500  | H | -2.62607300 | -2.47184100 | -0.99677300 |
| C | -3.56092700 | -0.75516100 | -0.16189400 | H | -3.35962000 | -2.75732800 | 0.56675400  |
| C | -2.78005000 | -2.02344400 | -0.00535500 | H | -1.55539500 | -1.70656900 | 1.75543900  |
| C | -1.42113600 | -1.74203200 | 0.66903700  | H | -0.72921200 | -2.56452400 | 0.46997100  |
| C | -4.20689500 | 1.46648600  | -0.24005100 | H | -4.50476800 | 2.06293900  | 0.62945400  |
| O | -5.32637000 | 0.65424300  | -0.64161300 | H | -3.96528700 | 2.15355200  | -1.05846600 |
| C | -4.96198700 | -0.66941300 | -0.60553300 | H | 2.13838300  | -0.40151900 | 2.05460700  |
| C | 1.07604500  | -0.21822200 | 1.89294700  | H | 0.54918200  | -1.02370700 | 2.40873900  |
| C | -1.85118700 | 1.08787500  | 2.07557200  | H | 0.82245200  | 0.71474800  | 2.39497600  |
| O | -5.74056100 | -1.55230600 | -0.90624000 | H | -2.04009600 | 0.17181600  | 2.63918000  |
| C | 1.59003100  | -1.23133600 | -0.36059600 | H | -2.69381000 | 1.76255800  | 2.25616800  |
| C | 2.91957800  | -0.47144500 | -0.74354200 | H | -0.96721900 | 1.57050500  | 2.49276000  |
| C | 2.62394900  | 1.05578000  | -0.59617800 | H | 1.12881500  | -1.46609700 | -1.33156700 |
| C | 4.06363000  | -0.73607100 | 0.22841000  | H | 2.85962600  | 1.72675800  | 1.52320300  |
| O | 4.28090100  | 0.31324500  | 1.03498300  | H | 4.15276000  | 2.27366500  | 0.44069400  |
| C | 3.46048500  | 1.45714200  | 0.65514900  | H | 2.37846100  | -2.99949100 | -0.10258600 |
| O | 1.78866500  | -2.41481900 | 0.39439200  | H | 3.97500100  | -1.58902300 | -1.92499400 |
| O | 3.35282400  | -0.85279300 | -2.04197200 | H | 4.14373400  | 1.77174300  | -1.98492900 |
| O | 4.73982600  | -1.74336600 | 0.25177300  | H | 2.86645200  | 2.94644100  | -1.63272300 |
| C | 3.07080900  | 1.88494500  | -1.80588100 | H | 2.54510100  | 1.57614700  | -2.71233700 |

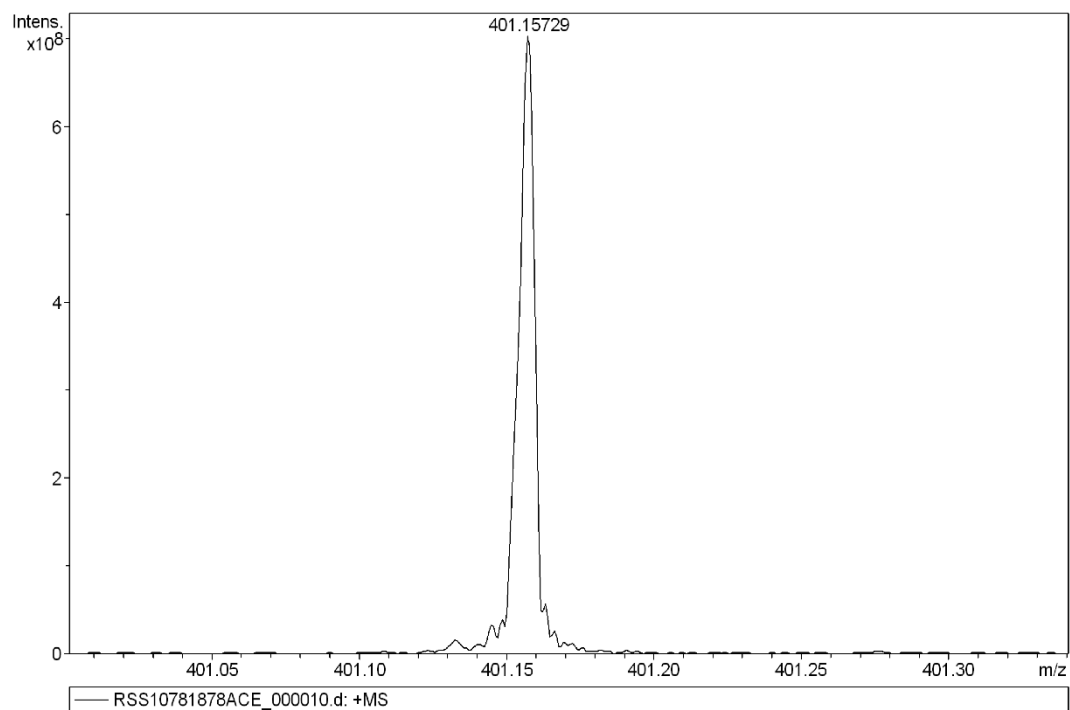

| Meas. m/z | # | Formula                                          | Score  | m/z       | err [mDa] | err [ppm] | mSigma | rdb | e <sup>-</sup> | Conf | N-Rule |
|-----------|---|--------------------------------------------------|--------|-----------|-----------|-----------|--------|-----|----------------|------|--------|
| 401.15729 | 1 | C <sub>20</sub> H <sub>26</sub> NaO <sub>7</sub> | 100.00 | 401.15707 | -0.22     | -0.54     | 11.1   | 7.5 | even           |      | ok     |

**Figure S10.** HRESIMS spectrum of **2**.

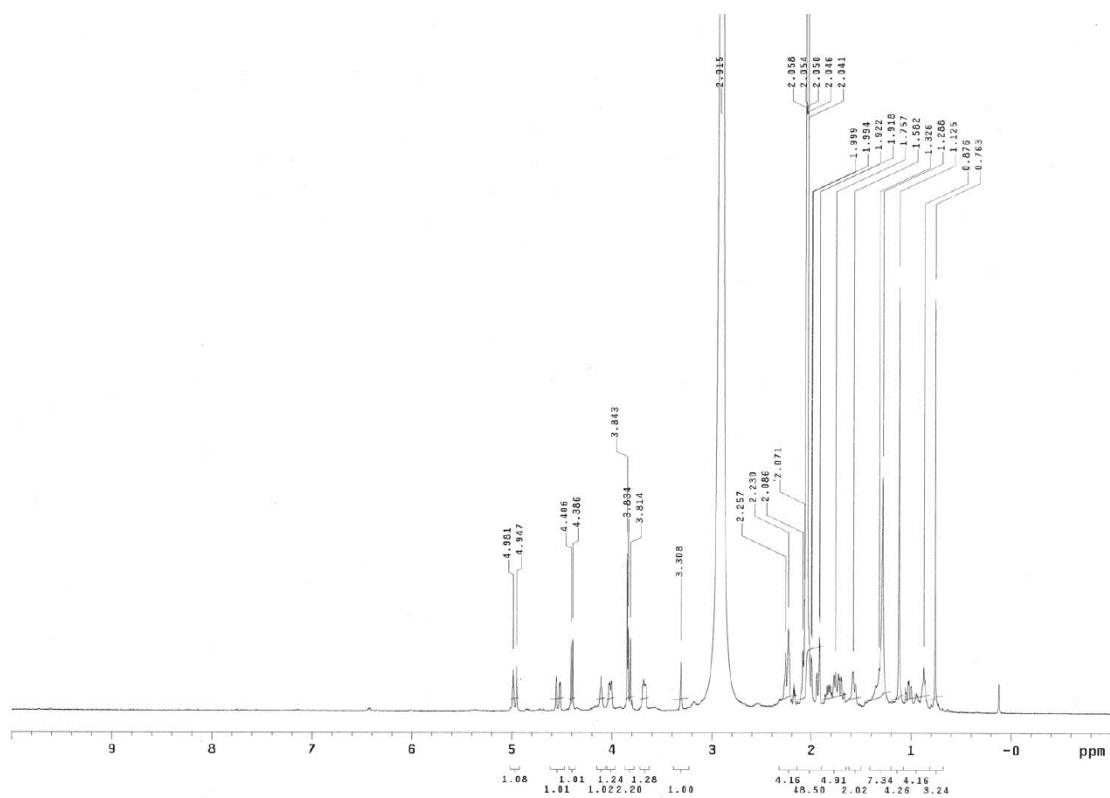

**Figure S11.** <sup>1</sup>H NMR spectrum of **2**.

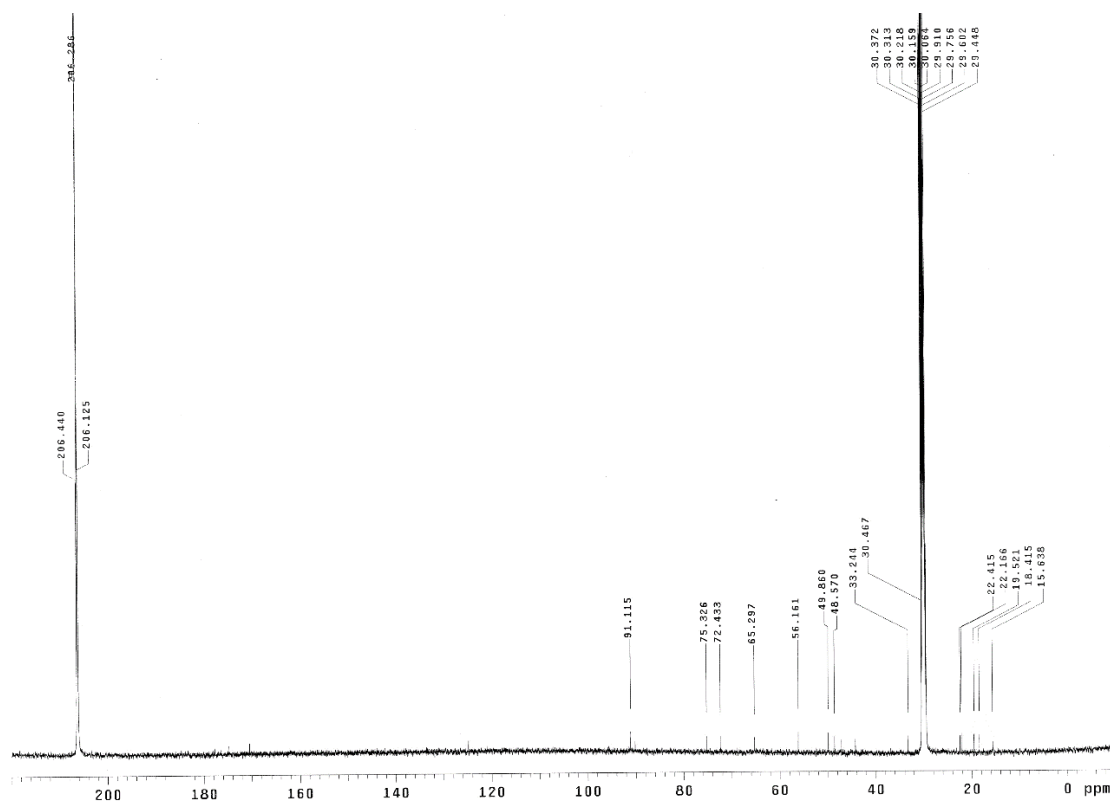

Figure S12. <sup>13</sup>C NMR spectrum of 2.

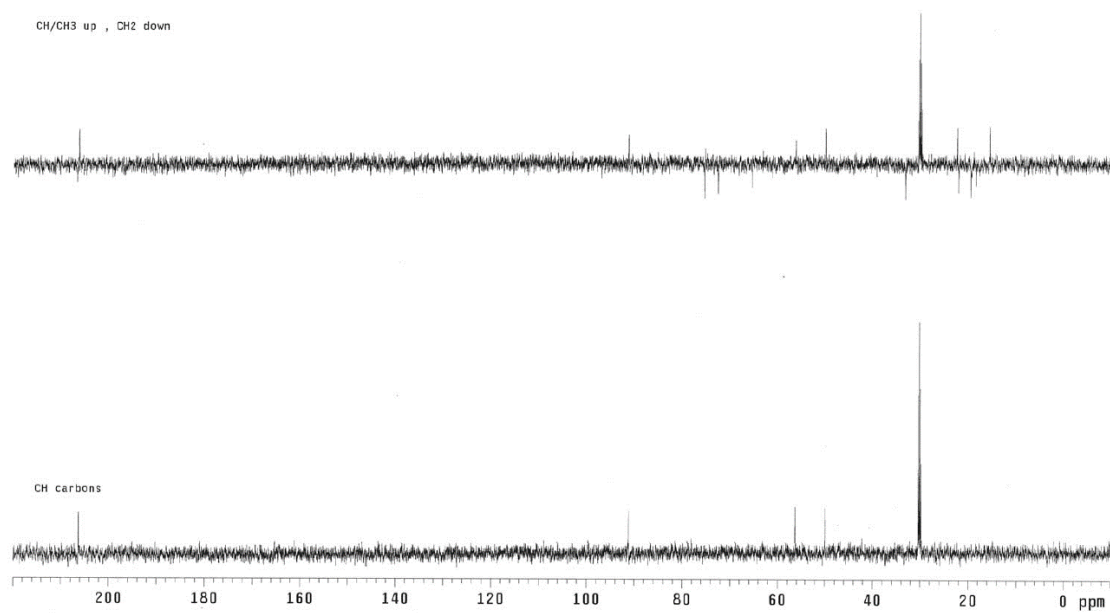

Figure S13. DEPT spectrum of 2.

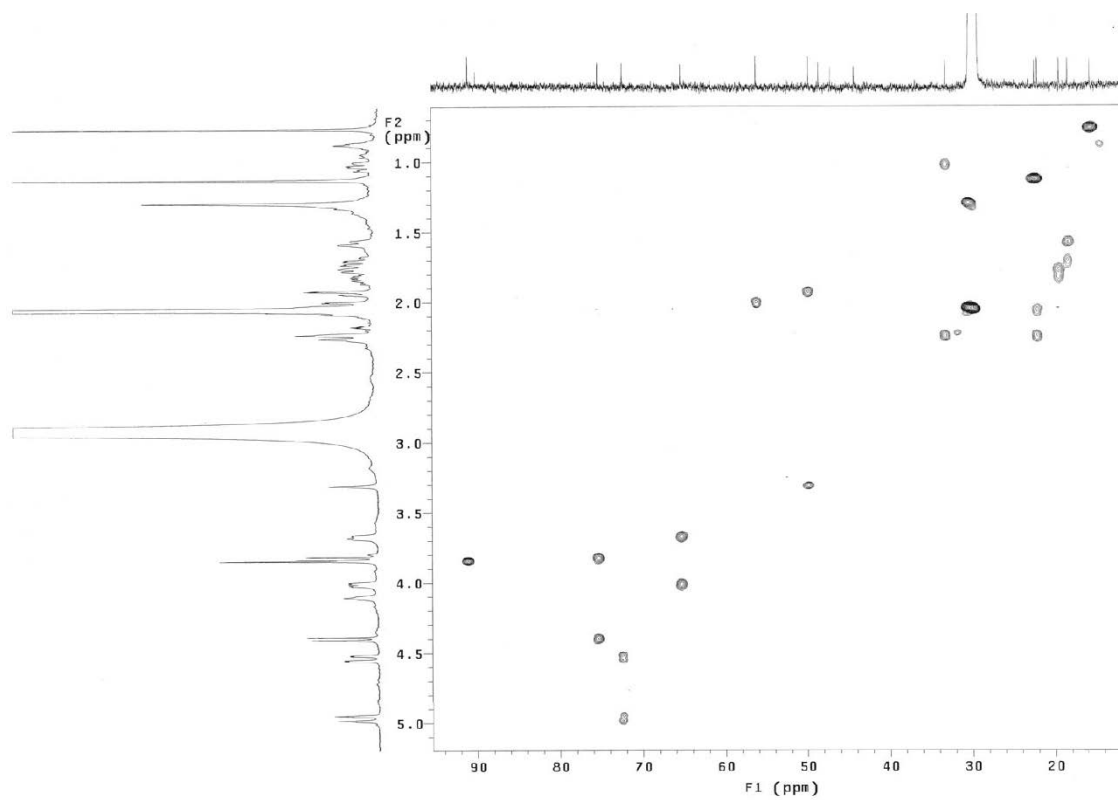

**Figure S14.** HSQC spectrum of **2**.

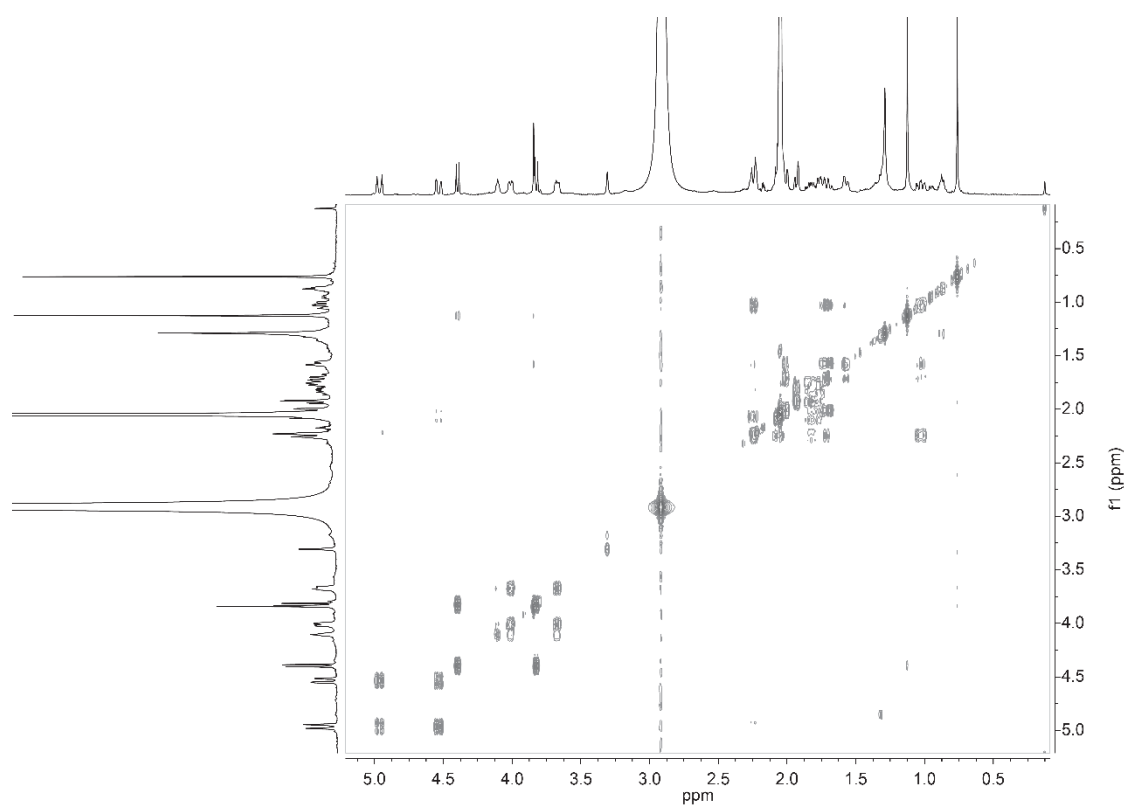

**Figure S15.**  $^1\text{H}$ - $^1\text{H}$  COSY spectrum of **2**.

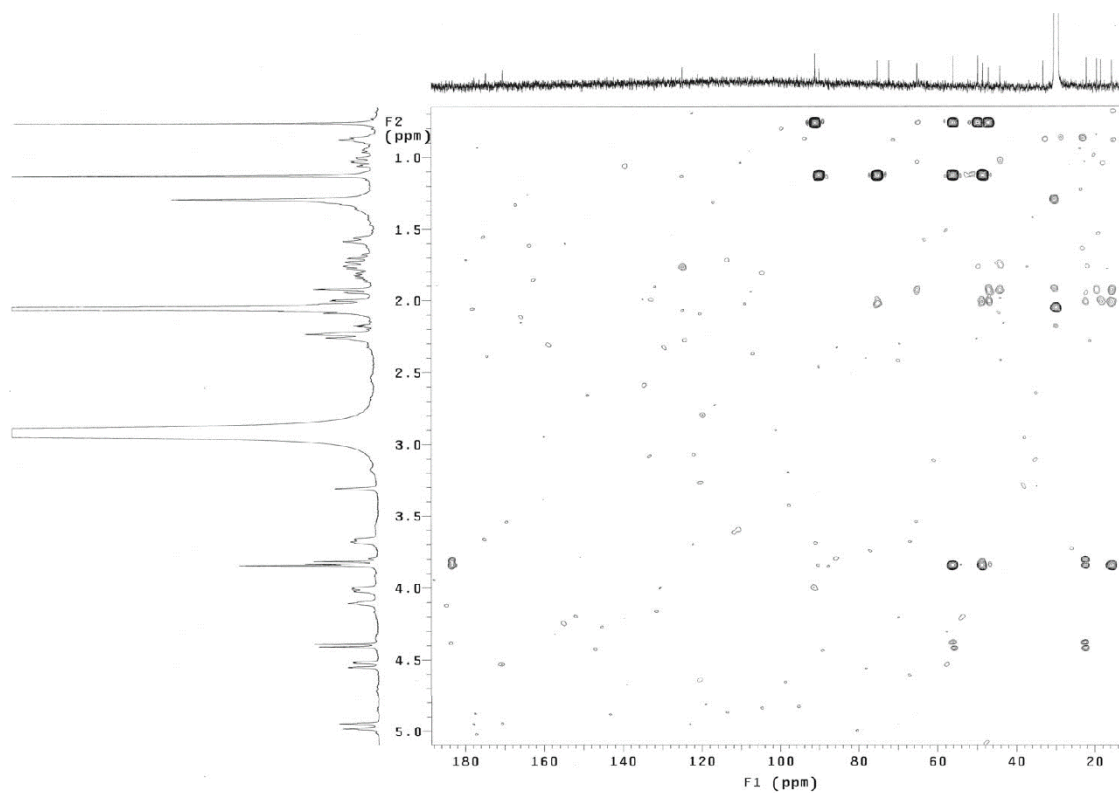

**Figure S16.** HMBC spectrum of **2**.

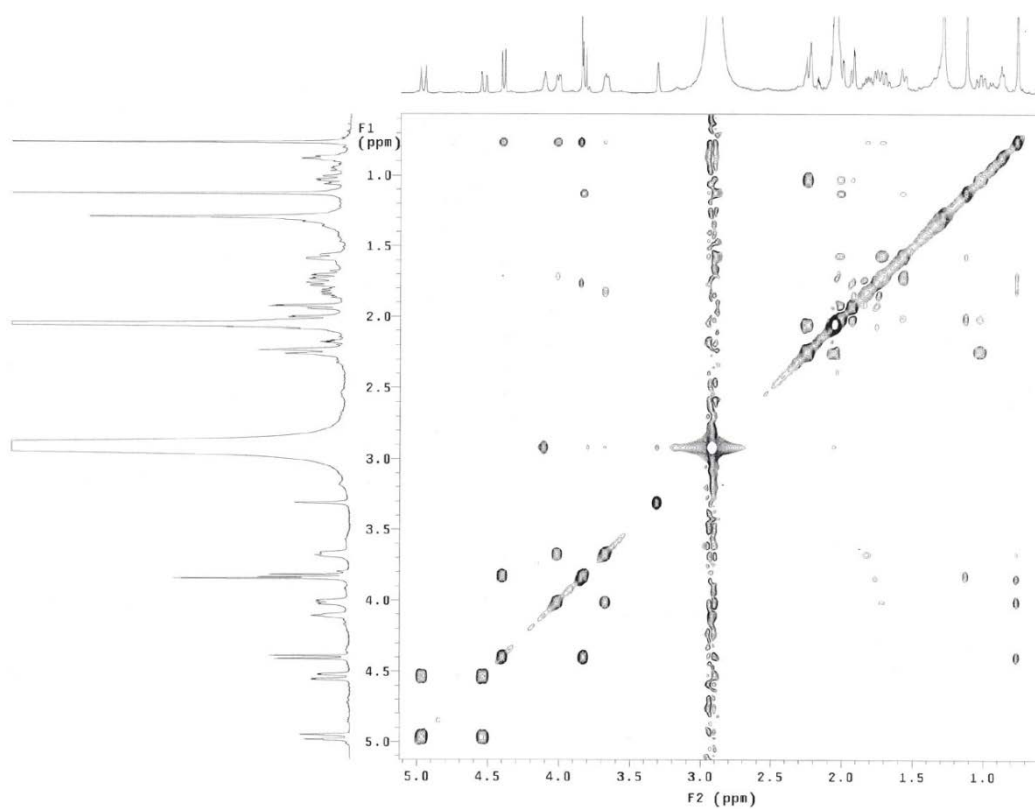

**Figure S17.** NOESY spectrum of **2**.

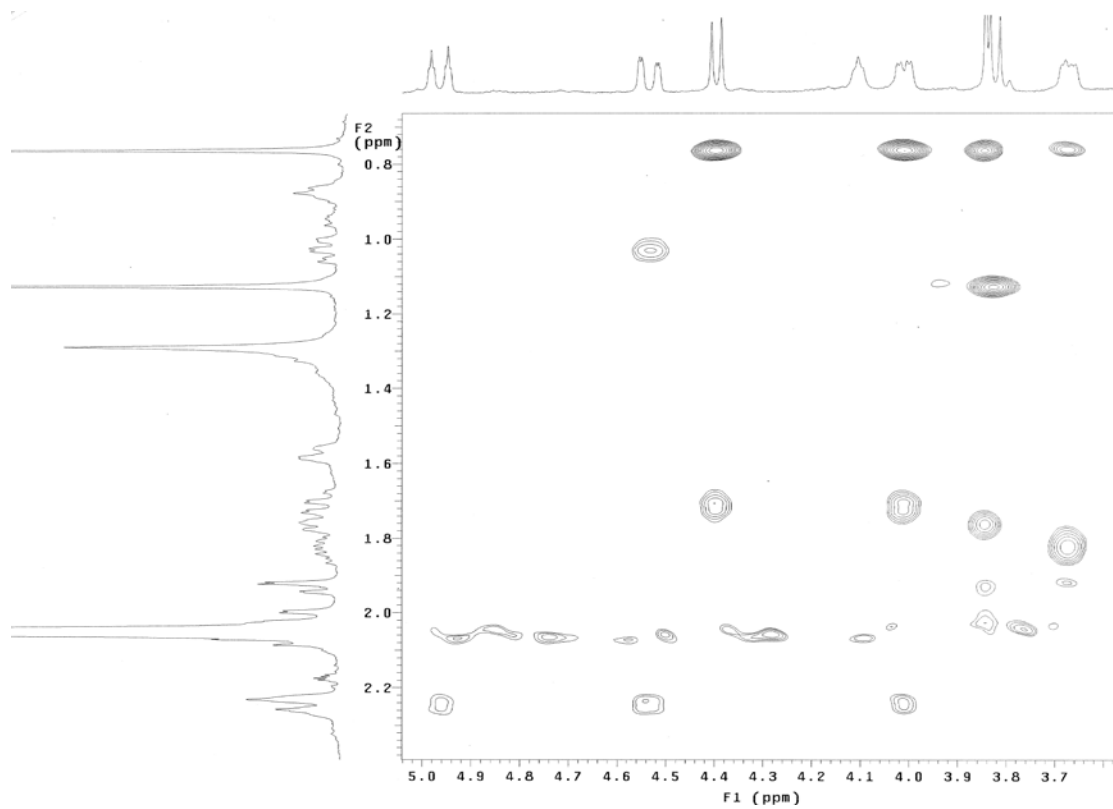

**Figure S18.** The partial NOESY spectrum of **2**.

**Table S2.** The cartesian coordinates of conformer **2**.

|   |             |             |             |   |             |             |             |
|---|-------------|-------------|-------------|---|-------------|-------------|-------------|
| C | -0.76119200 | 0.23711000  | 0.30999000  | H | -0.70752100 | -0.48368400 | -1.67678900 |
| C | -1.12793200 | -0.86204000 | -0.73168100 | H | -0.71223200 | -2.92879600 | -1.24964800 |
| C | -0.41889900 | -2.19300700 | -0.48959400 | H | -0.66863400 | -2.61312300 | 0.48718400  |
| C | 1.10726000  | -1.96637100 | -0.59624900 | H | 1.63751100  | -2.89825700 | -0.36855300 |
| C | 1.65734700  | -0.81830500 | 0.30351100  | H | 1.33535700  | -1.71912400 | -1.64176600 |
| C | 0.76313400  | 0.48385200  | 0.14825800  | H | 0.88333000  | 0.74808200  | -0.91431500 |
| C | 3.03470700  | -0.37787000 | -0.15905600 | H | 3.30308500  | 2.66345100  | 1.07921900  |
| C | 3.49152900  | 0.88463600  | -0.10006500 | H | 2.57955600  | 2.75594700  | -0.51248900 |
| C | 2.72052800  | 2.08764400  | 0.34931400  | H | 0.65964300  | 2.52148500  | 0.88132500  |
| C | 1.35116100  | 1.67592700  | 0.93120200  | H | 1.46007500  | 1.43238000  | 1.99413500  |
| C | 4.12501500  | -1.25840400 | -0.70936800 | H | 4.45578100  | -2.03835600 | -0.01436900 |
| O | 5.23211400  | -0.37113000 | -0.95431200 | H | 3.85227600  | -1.73818300 | -1.65581200 |
| C | 4.87587300  | 0.90744600  | -0.60535600 | H | -0.57986700 | -0.88317000 | 2.18543100  |
| C | -1.13998500 | -0.04151900 | 1.77752900  | H | -0.92463300 | 0.84532200  | 2.38345100  |
| C | 1.91274700  | -1.34049300 | 1.75756400  | H | -2.19979600 | -0.26681200 | 1.91731200  |
| O | 5.64477300  | 1.83966900  | -0.72651500 | H | 2.91690600  | -1.78490300 | 1.78907100  |
| C | -1.64352300 | 1.38176800  | -0.26730700 | H | 1.91625700  | -0.49900600 | 2.46112800  |
| C | -2.98978300 | 0.69691300  | -0.65779200 | H | -1.20107800 | 1.70882600  | -1.21722600 |
| C | -2.66424800 | -0.78987700 | -0.98914800 | H | -4.27257400 | -2.23149900 | -0.49487100 |
| C | -3.97912700 | 0.62211700  | 0.51155400  | H | -2.96915800 | -2.19741900 | 0.71154600  |
| O | -4.31123500 | -0.64165800 | 0.80247600  | H | -2.55168900 | 2.44099100  | 1.11350300  |
| C | -3.54583500 | -1.59188400 | 0.00987400  | H | -3.76496000 | 2.29942400  | -1.42104200 |
| O | -1.80863300 | 2.56662200  | 0.49579700  | H | -2.46992600 | -0.58006600 | -3.15288800 |
| O | -3.64293200 | 1.38076200  | -1.72009700 | H | -2.74051100 | -2.24344000 | -2.59796100 |
| O | -4.44615200 | 1.57506500  | 1.10815700  | H | -4.08229700 | -1.08426700 | -2.62412200 |
| C | -3.01131800 | -1.19510800 | -2.42852900 | H | 1.21019300  | -2.61072500 | 3.05454300  |
| O | 0.96833400  | -2.33311500 | 2.15650900  |   |             |             |             |

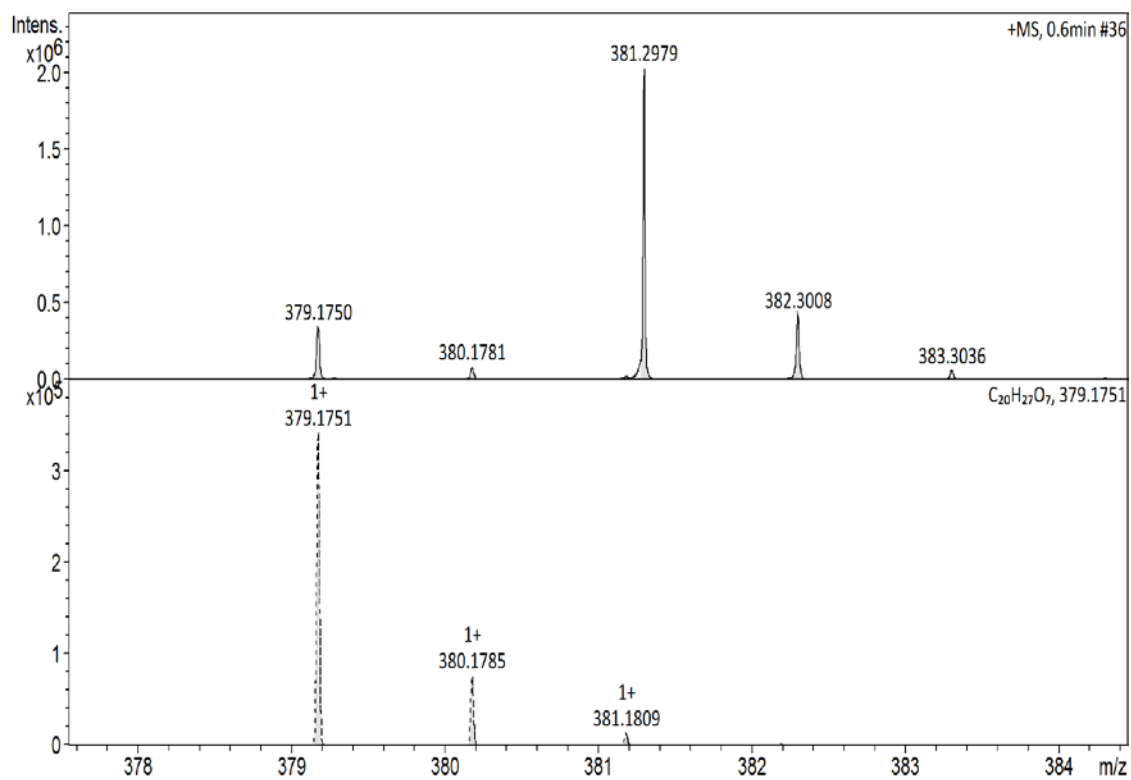

**Figure S19.** HRESIMS spectrum of **3**.

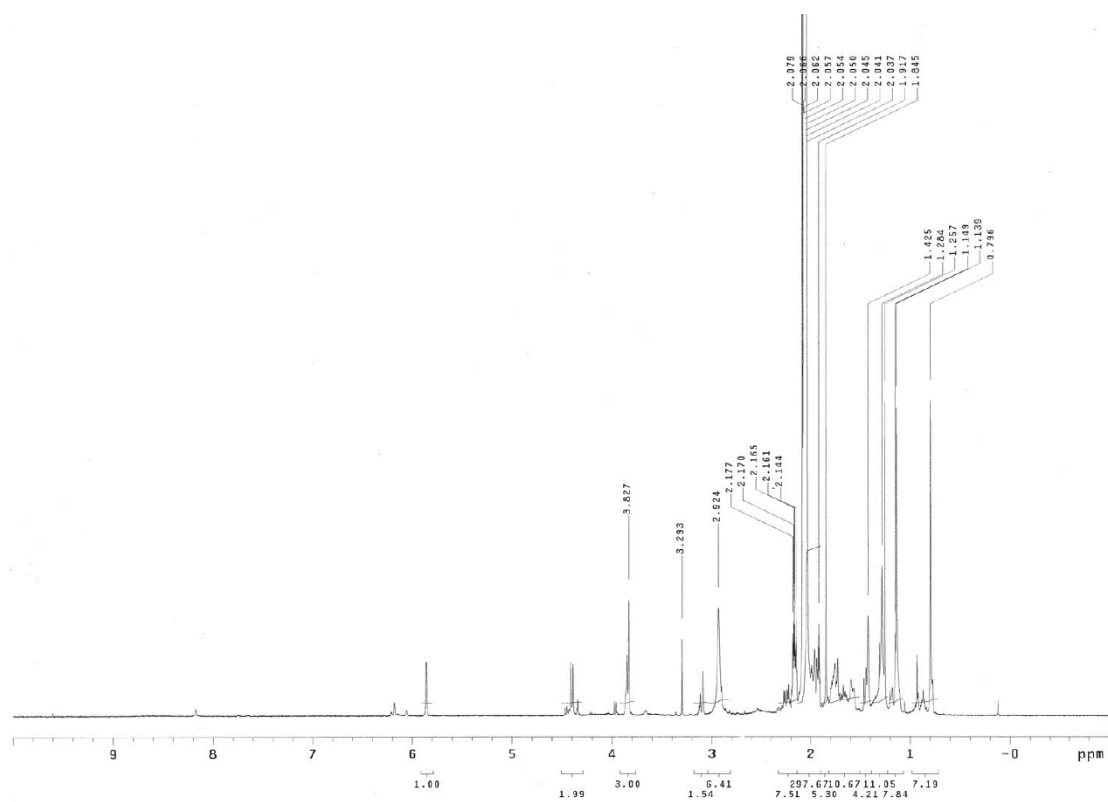

**Figure S20.**  $^1\text{H}$  NMR spectrum of **3**.



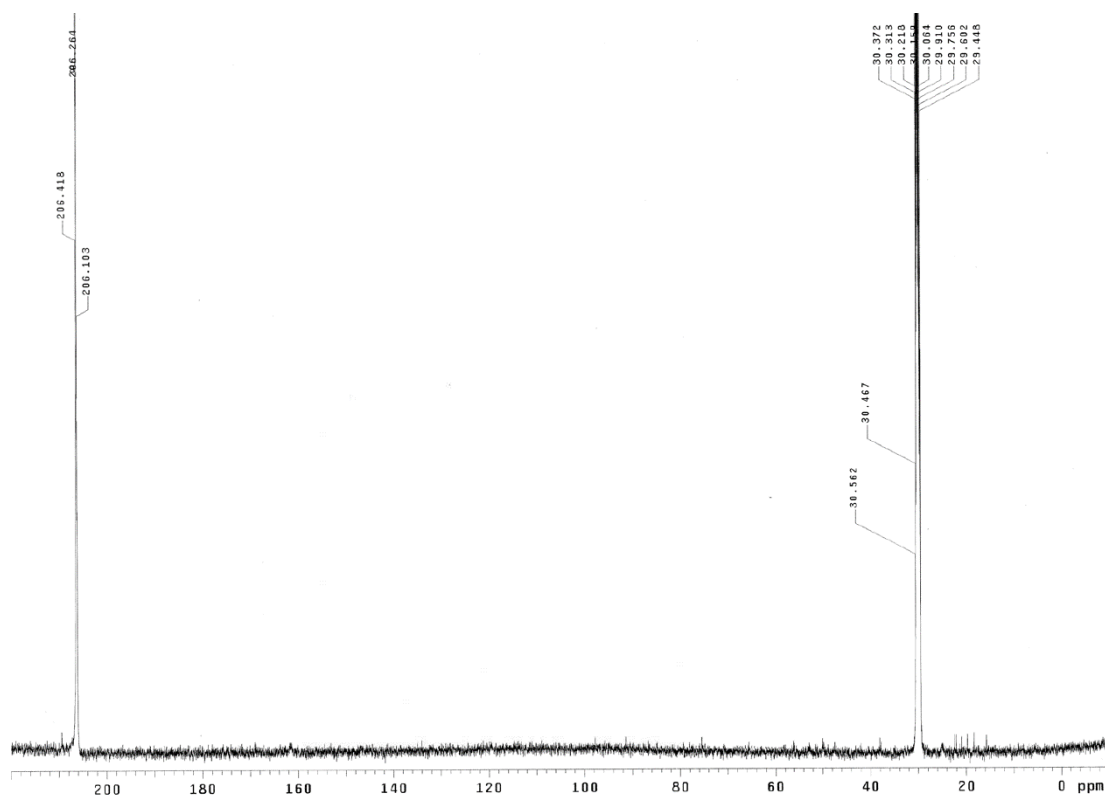

**Figure S21.**  $^{13}\text{C}$  NMR spectrum of **3**.

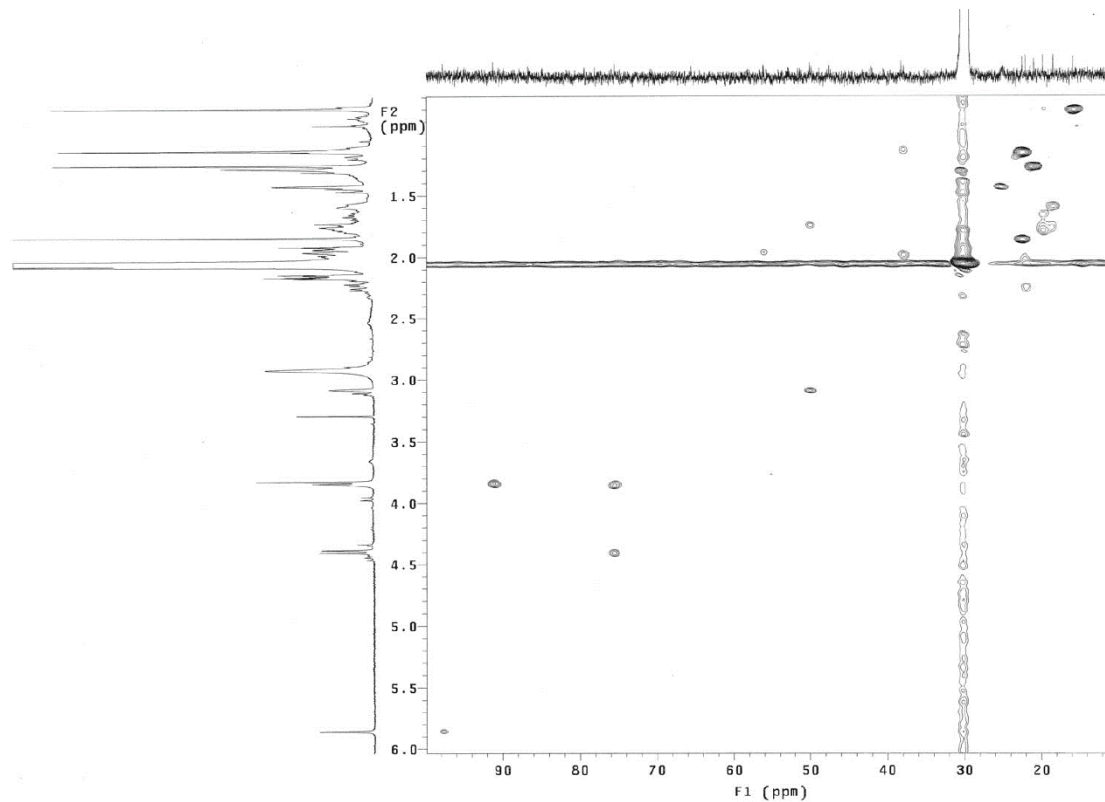

**Figure S22.** HSQC spectrum of **3**.

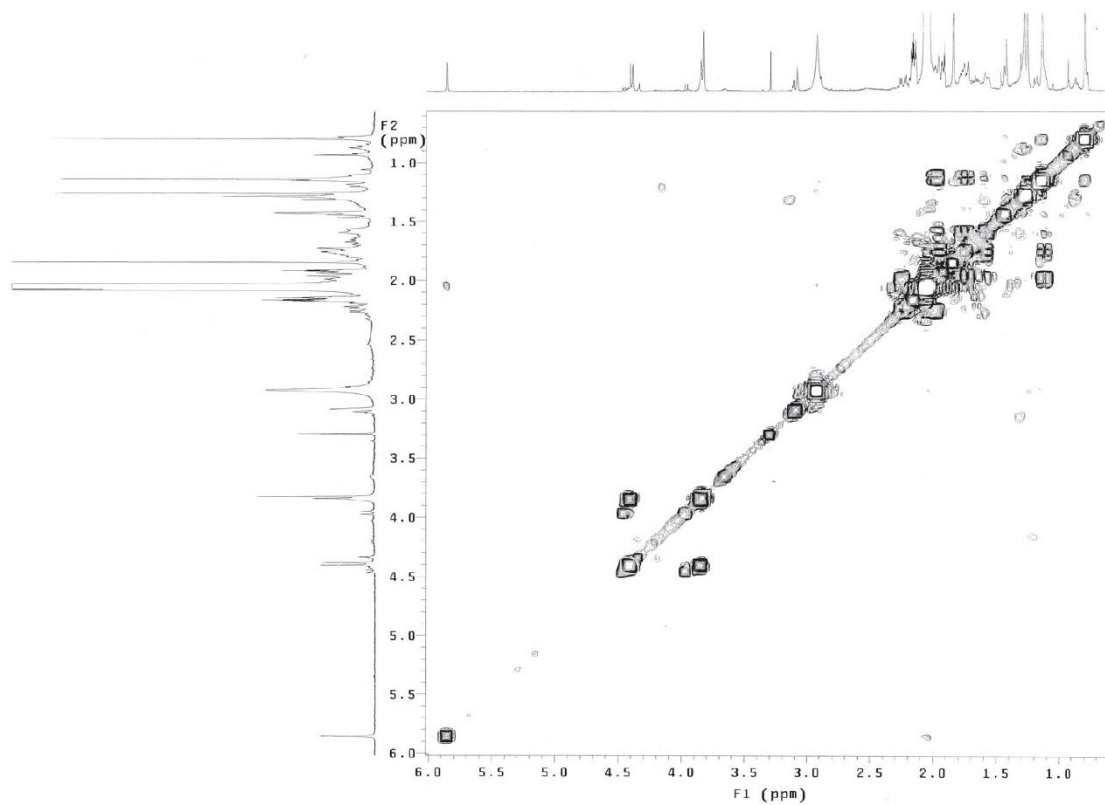

**Figure S23.**  $^1\text{H}$ – $^1\text{H}$  COSY spectrum of **3**.

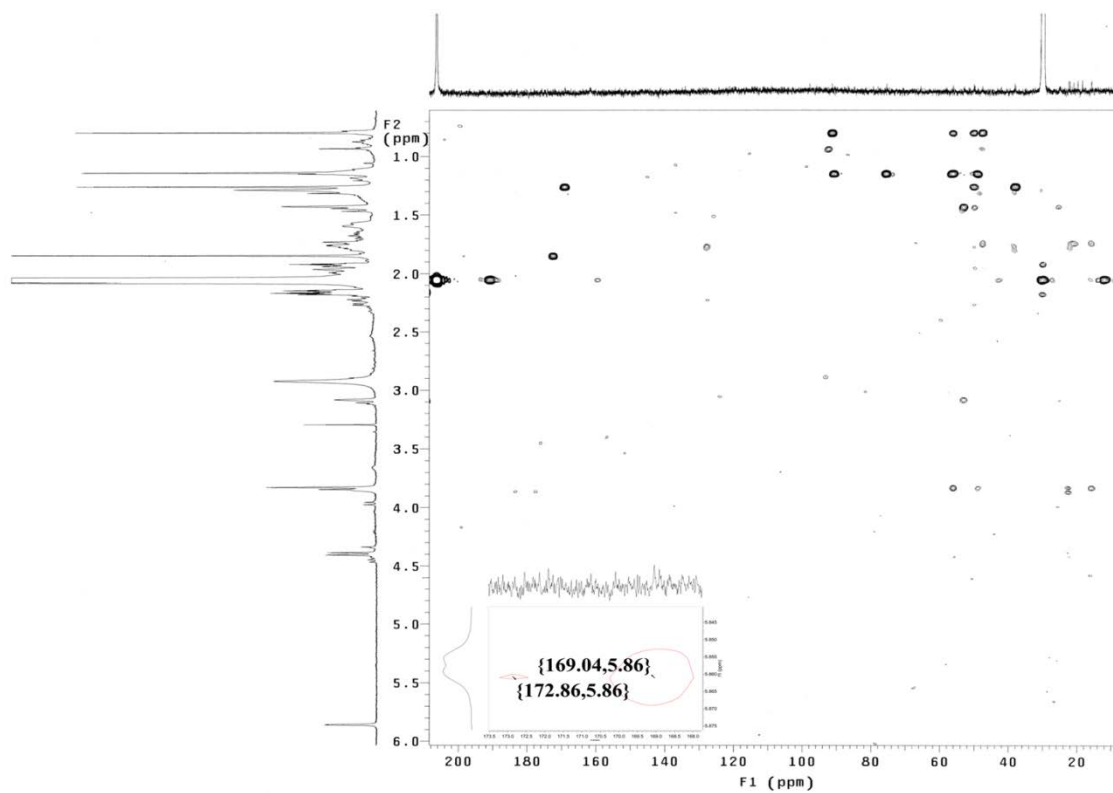

**Figure S24.** HMBC spectrum of **3**.

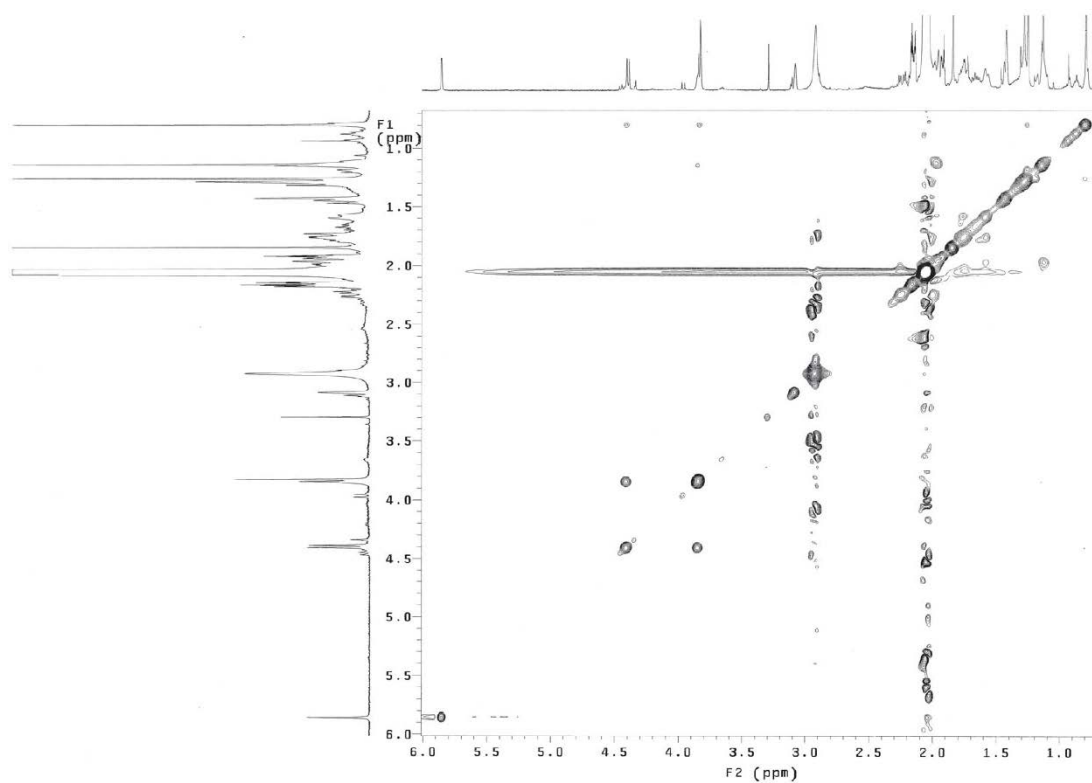

**Figure S25.** NOESY spectrum of **3**.

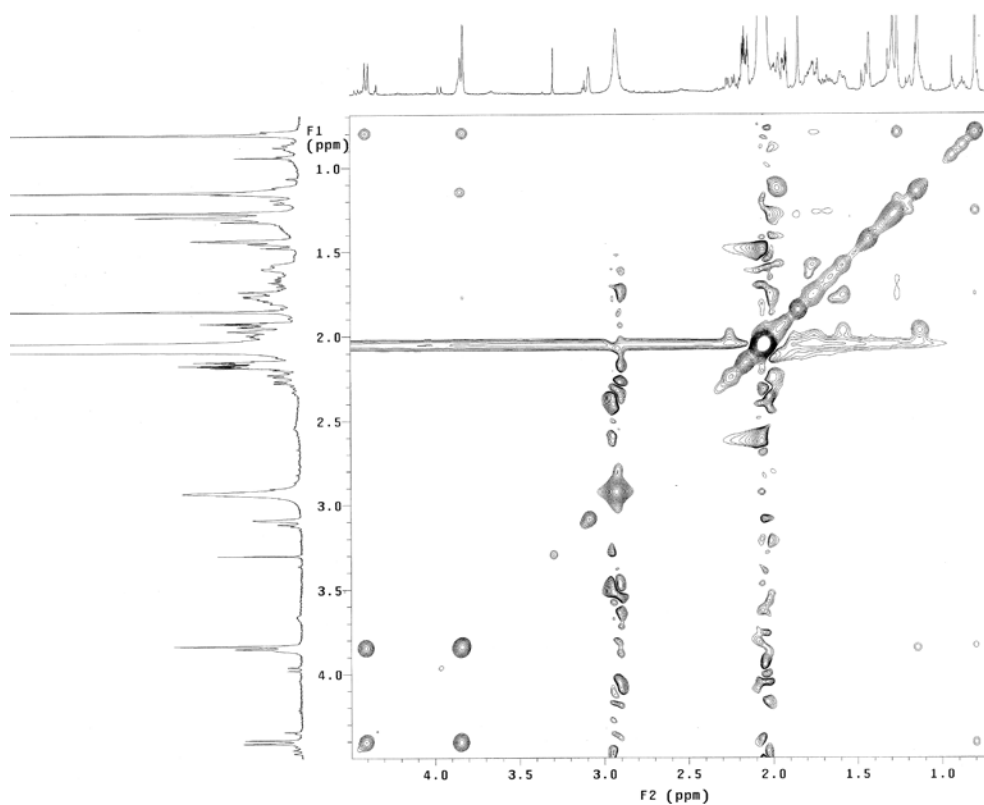

**Figure S26.** The partial NOESY spectrum of **3**.

**Table S3.** The cartesian coordinates of conformer **3**.

|                                       |                                       |
|---------------------------------------|---------------------------------------|
| C -0.89718400 0.24914900 0.36747300   | H -0.85292400 -0.79890800 -1.47178300 |
| C -1.22144500 -1.02986700 -0.45948300 | H -0.62406200 -2.52751400 1.01853200  |
| C -0.42117000 -2.25762100 -0.02477500 | H -0.69300900 -3.13190200 -0.62864700 |
| C 1.07952800 -1.95976800 -0.23612900  | H 1.25052100 -1.85337300 -1.31628900  |
| C 1.56492100 -0.66878600 0.48609600   | H 1.68597300 -2.81018000 0.09730900   |
| C 0.61294500 0.54241300 0.13053200    | H 0.70099000 0.63961200 -0.96318400   |
| C 2.93302600 -0.24935300 -0.01241700  | H 2.33108100 2.74566000 -0.90478400   |
| C 3.32932000 1.02219300 -0.17233400   | H 3.04374000 2.96566000 0.67933800    |
| C 2.49619700 2.24442800 0.06003000    | H 1.27116900 1.79973900 1.79310100    |
| C 1.14598300 1.86993700 0.70704300    | H 0.42018500 2.66930600 0.53079000    |
| C 4.06713900 -1.16750700 -0.41334100  | H 3.83685900 -1.75342600 -1.31080300  |
| O 5.14343400 -0.27042800 -0.79423400  | H -2.34383000 0.28952700 2.03497900   |
| C 4.72363900 1.02780600 -0.66048700   | H -0.80844400 1.03013100 2.40159700   |
| C -1.26938900 0.19604800 1.86706200   | H -0.94469800 -0.72610600 2.34956200  |
| C 1.72880000 -0.97513200 2.00342500   | H 1.86300600 -0.06597200 2.59582900   |
| O 5.44175900 1.96610500 -0.93356600   | H 2.61309300 -1.60077500 2.15007400   |
| C -1.83999900 1.24964100 -0.35641400  | H 0.87296200 -1.52071800 2.40493000   |
| C -3.13610000 0.43381600 -0.71230100  | H -1.40287200 1.50477300 -1.33403400  |
| C -2.75878800 -1.07946400 -0.65898900 | H -2.96139800 -1.89636600 1.41078000  |
| C -4.23549100 0.59627000 0.33137700   | H -4.22775400 -2.43988200 0.29189000  |
| O -4.45237700 -0.53188800 1.01241800  | H -3.02301300 2.66016100 0.34209400   |
| C -3.57567400 -1.60601500 0.55799200  | H -4.15808600 1.65952700 -1.82677300  |
| O -2.07462000 2.44343800 0.37753900   | H -4.23416600 -1.80855600 -2.09344800 |
| O -3.67011800 0.82894400 -1.96977000  | H -2.87613800 -2.91236900 -1.81321100 |
| O -4.86765400 1.62085500 0.51413300   | H -2.65281700 -1.45828900 -2.80599500 |
| C -3.15466500 -1.85803500 -1.92062600 | H 5.04276400 -2.68252400 0.28872600   |
| O 4.45974000 -1.98929700 0.64060700   |                                       |

**Table S4.** The cartesian coordinates of conformer **3c**.

|                                       |                                       |
|---------------------------------------|---------------------------------------|
| C 0.89862700 -0.32488400 0.33256800   | H 0.80085700 1.01490800 -1.30136600   |
| C 1.21724500 1.06925100 -0.28340700   | H 0.69338400 2.29455900 1.45151800    |
| C 0.45656700 2.21372800 0.38356300    | H 0.72895000 3.17602800 -0.06774500   |
| C -1.05450400 1.98111800 0.16311000   | H -1.25876200 2.06645700 -0.91058900  |
| C -1.55039800 0.59505100 0.67184700   | H -1.63095900 2.77549100 0.65099800   |
| C -0.62496900 -0.55925500 0.10277000  | H -0.74940900 -0.48237300 -0.98939400 |
| C -2.94667800 0.26396300 0.17121600   | H -2.39307700 -2.53065300 -1.22258900 |
| C -3.36361600 -0.97266000 -0.15237200 | H -3.05538200 -3.03643900 0.31998600  |
| C -2.52700500 -2.21375500 -0.17779700 | H -1.25266100 -2.05911100 1.56818700  |
| C -1.15723100 -1.95671500 0.48129400  | H -0.44709600 -2.72329700 0.15864000  |
| C -4.12369600 1.21482500 0.06287100   | H -4.41613000 1.66471900 1.01725000   |
| O -5.23980900 0.36631600 -0.33175300  | H 2.39540800 -0.58132900 1.94865500   |
| C -4.80110200 -0.92019400 -0.48233900 | H 0.91525200 -1.48353000 2.17786000   |
| C 1.31324300 -0.53463400 1.80579900   | H 0.95021000 0.25444300 2.46378200    |
| C -1.67559600 0.65765600 2.22463600   | H -1.81241900 -0.33049000 2.67199000  |
| O -5.55238000 -1.81724200 -0.81648200 | H -2.54335500 1.26669600 2.50241900   |
| C 1.80658700 -1.18184200 -0.59779200  | H -0.80580600 1.12814600 2.68671100   |
| C 3.12524400 -0.35421500 -0.77030500  | H 1.34930200 -1.20194600 -1.59443500  |
| C 2.74955000 1.14387800 -0.54234800   | H 3.01801300 1.78827600 1.57664000    |
| C 4.18375100 -0.65034800 0.30295700   | H 4.27102800 2.39672200 0.47215100    |
| O 4.46658200 0.43270300 1.03299700    | H 2.76733300 -2.63418400 0.34922200   |
| C 3.60626200 1.55841000 0.68682700    | H 3.91323600 -1.54274100 -2.11220000  |
| O 2.01655200 -2.54860000 -0.26473200  | H 4.15005700 2.06341400 -1.94777100   |
| O 3.72938100 -0.58916400 -2.03821900  | H 2.77456200 3.08750500 -1.50149100   |
| O 4.73730300 -1.72175200 0.47934200   | H 2.54872000 1.74100400 -2.63473300   |
| C 3.07697000 2.05912600 -1.73134300   | H -4.59511700 2.86901700 -0.84276100  |
| O -3.90408600 2.18870000 -0.91133600  |                                       |

**Table S5.** Cytotoxicity (ED<sub>50</sub> µg/mL) of compounds **1–3**.

| <b>Compound</b> | <b>ED<sub>50</sub> (µg/mL)</b> |
|-----------------|--------------------------------|
|                 | <b>HCC Huh7 cell</b>           |
| <b>1</b>        | > 20 µg/mL                     |
| <b>2</b>        | > 20 µg/mL                     |
| <b>3</b>        | > 20 µg/mL                     |

Results are presented as mean ± SD. (n = 3).
